# Supplementary material
Source: PubMed Central journal article supplement (PMC10201405)
Supplement: jama-e238812-s002.pdf [file jama-e238812-s002.pdf]

## Supplemental Online Content

Curtis JR, Lee RY, Brumback LC, et al. Intervention to promote communication about goals of care for hospitalized patients with serious illness: a randomized clinical trial. *JAMA*. Published online May 21, 2023. doi:10.1001/jama.2023.8812

**eTable.** Intervention effect on occurrence of NLP-identified goals-of-care discussions within specific racial groups and within specific ethnic groups

**eText.** NLP performance by randomization group or by race and ethnicity

**eFigure 1.** NLP performance over randomization groups within internal validation sample

**eFigure 2.** NLP performance over minoritized race or ethnicity within internal validation sample

**eReference**

This supplemental material has been provided by the authors to give readers additional information about their work.

**eTable 1.** Intervention effect on occurrence of NLP-identified goals-of-care discussions within specific racial groups and within specific ethnic groups<sup>a</sup>

| Comparison Groups | n     | Usual Care,<br>% | Intervention,<br>% | Difference,<br>coefficient | 95% CI        | <i>p</i>            |
|-------------------|-------|------------------|--------------------|----------------------------|---------------|---------------------|
| <b>Race</b>       |       |                  |                    |                            |               |                     |
| Asian             | 292   | 29.5             | 40.6               | 10.3                       | -0.9, 21.4    | 0.070               |
| Black             | 316   | 21.6             | 32.1               | 10.9                       | 1.2, 20.6     | 0.028               |
| Native American   | 45    | 25.0             | 23.8               | -9.4                       | -38.8, 19.9   | 0.519               |
| Pacific Islander  | 13    | 22.2             | 50.0               | 33.3                       | -104.9, 171.6 | 0.593               |
| White             | 1,768 | 31.6             | 34.0               | 2.4                        | -2.0, 6.7     | 0.292               |
| Unknown race      | 78    | 43.9             | 37.8               | -4.0                       | -27.5, 19.5   | 0.736               |
| <b>Ethnicity</b>  |       |                  |                    |                            |               |                     |
| Hispanic          | 150   | 24.7             | 36.4               | 13.0                       | -1.7, 27.6    | 0.083               |
| Non-Hispanic      | 2,347 | 30.6             | 34.4               | 3.8                        | 0.0, 7.6      | <0.050 <sup>b</sup> |
| Unknown ethnicity | 15    | 50.0             | 28.6               | -27.3                      | -131.7, 77.1  | 0.573               |

<sup>a</sup> The percentages in the two randomization groups are unadjusted. The linear regression results showing the difference (coefficient for randomization condition), *p*, and 95% confidence interval are adjusted for hospital site and for Alzheimer Disease and related dementias (ADRD).

<sup>b</sup> *P*-value to 4 decimal places = 0.0497.

**eText.** NLP performance by randomization group or by race and ethnicity

To examine the possibility of differential NLP performance by randomization group or by race and ethnicity, we conducted *post hoc* receiver operating characteristic (ROC) curve analyses and tested for equality of area under the ROC curve ( $AUC_{ROC}$ ) over randomization group, and over race and ethnicity using previously described methods.<sup>1</sup> In a random sample of 159 trial participants oversampled for patients with dementia (n=80/159) that underwent complete manual whole-chart abstraction, 1,258/2,480 notes belonged to 82/159 patients in the intervention group, and 1,132/2,470 notes belonged to 73/158 patients of known minoritized race or ethnicity (i.e. non-white race or Hispanic ethnicity). There were no significant differences in NLP  $AUC_{ROC}$  at the note or patient levels between randomization groups (eFigure 1) or minoritized race or ethnicity (eFigure 2).

**eFigure 1.** NLP performance over randomization groups within internal validation sample

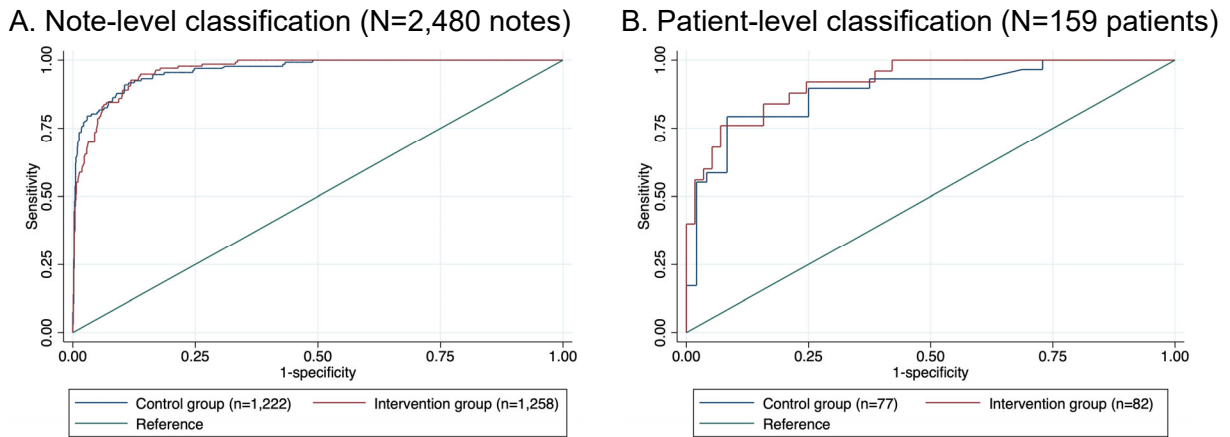

| Randomization group                                     | N           | n (%) with GOCD <sup>a</sup> | AUC <sub>ROC</sub> <sup>b</sup> | 95%CI        | p <sup>c</sup> |
|---------------------------------------------------------|-------------|------------------------------|---------------------------------|--------------|----------------|
| <b>A. Note-level classification (N=2,480 notes)</b>     |             |                              |                                 |              |                |
| Control group                                           | 1,222 notes | 132 (11)                     | 0.964                           | 0.949, 0.979 | 0.99           |
| Intervention group                                      | 1,258 notes | 136 (11)                     | 0.964                           | 0.952, 0.975 |                |
| <b>B. Patient-level classification (N=159 patients)</b> |             |                              |                                 |              |                |
| Control group                                           | 77 patients | 29 (38)                      | 0.887                           | 0.807, 0.967 | 0.48           |
| Intervention group                                      | 82 patients | 25 (30)                      | 0.923                           | 0.865, 0.981 |                |

<sup>a</sup> Documented goals-of-care discussions (GOCD) as determined by gold standard of manual whole-chart abstraction.

<sup>b</sup> Area under the receiver operating characteristic curve for NLP classification of notes or patients with or without documented goals-of-care discussions against human-abstracted gold standard.

<sup>c</sup> P-value for test of equality of AUC<sub>ROC</sub> (H<sub>0</sub>: AUC<sub>1</sub>=AUC<sub>2</sub>) for independent ROC areas.

**eFigure 2.** NLP performance over minoritized race or ethnicity within internal validation sample

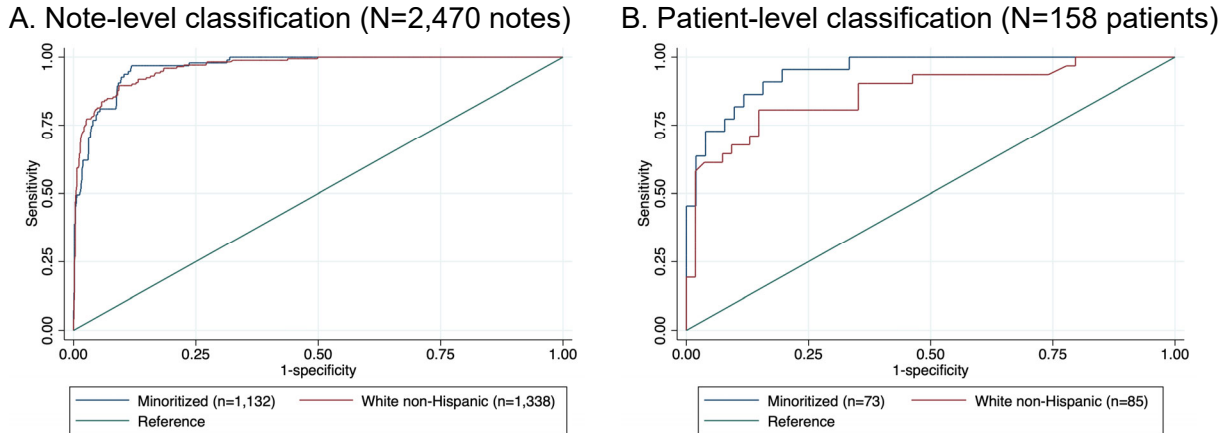

| Race and ethnicity <sup>a</sup>                         | N           | n (%) with GOCD <sup>b</sup> | AUC <sub>ROC</sub> <sup>c</sup> | 95%CI        | p <sup>d</sup> |
|---------------------------------------------------------|-------------|------------------------------|---------------------------------|--------------|----------------|
| <b>A. Note-level classification (N=2,470 notes)</b>     |             |                              |                                 |              |                |
| Non-white or Hispanic                                   | 1,132 notes | 95 (8)                       | 0.966                           | 0.952, 0.979 | 0.90           |
| White, non-Hispanic                                     | 1,338 notes | 172 (13)                     | 0.965                           | 0.952, 0.977 |                |
| <b>B. Patient-level classification (N=158 patients)</b> |             |                              |                                 |              |                |
| Non-white or Hispanic                                   | 73 patients | 22 (30)                      | 0.948                           | 0.902, 0.995 | 0.11           |
| White, non-Hispanic                                     | 85 patients | 31 (36)                      | 0.869                           | 0.784, 0.953 |                |

<sup>a</sup> One patient in the internal validation sample had missing data for race and ethnicity.

<sup>b</sup> Documented goals-of-care discussions (GOCD) as determined by gold standard of manual whole-chart abstraction.

<sup>c</sup> Area under the receiver operating characteristic curve for NLP classification of notes or patients with or without documented goals-of-care discussions against human-abstracted gold standard.

<sup>d</sup> P-value for test of equality of AUC<sub>ROC</sub> (H<sub>0</sub>: AUC<sub>1</sub>=AUC<sub>2</sub>) for independent ROC areas.

## eReference

1. DeLong ER, DeLong DM, Clarke-Pearson DL. Comparing the areas under two or more correlated receiver operating characteristic curves: a nonparametric approach. *Biometrics* 1988;44(3):837-45.
