# Supplementary material
Source: PubMed Central journal article supplement (PMC10201405)
Supplement: jama-e238812-s003.pdf [file jama-e238812-s003.pdf]

## Data Sharing Statement

Curtis. Intervention to Promote Communication About Goals of Care for Hospitalized Patients With Serious Illness. *JAMA*. Published May 21, 2023. doi:10.1001/jama.2023.8812

### Data

**Data available:** Yes

**Data types:** Deidentified participant data

**How to access data:** <https://depts.washington.edu/eolcare>

**When available:** beginning date: 06-01-2027

### Supporting Documents

**Document types:** None

### Additional Information

**Who can access the data:** Researchers whose proposed use of the data has been approved

**Types of analyses:** Quantitative analyses, factors contributing to intervention effect

**Mechanisms of data availability:** without investigator support

**Any additional restrictions:** use of data will require completion of a Data Use Agreement
